# Supplementary figures and images for: Chimeras taking shape: Potential functions of proteins encoded by chimeric RNA transcripts
Source: HighWire-hosted journal article supplement (doi:10.1101/gr.130062.111), 2012-05-15

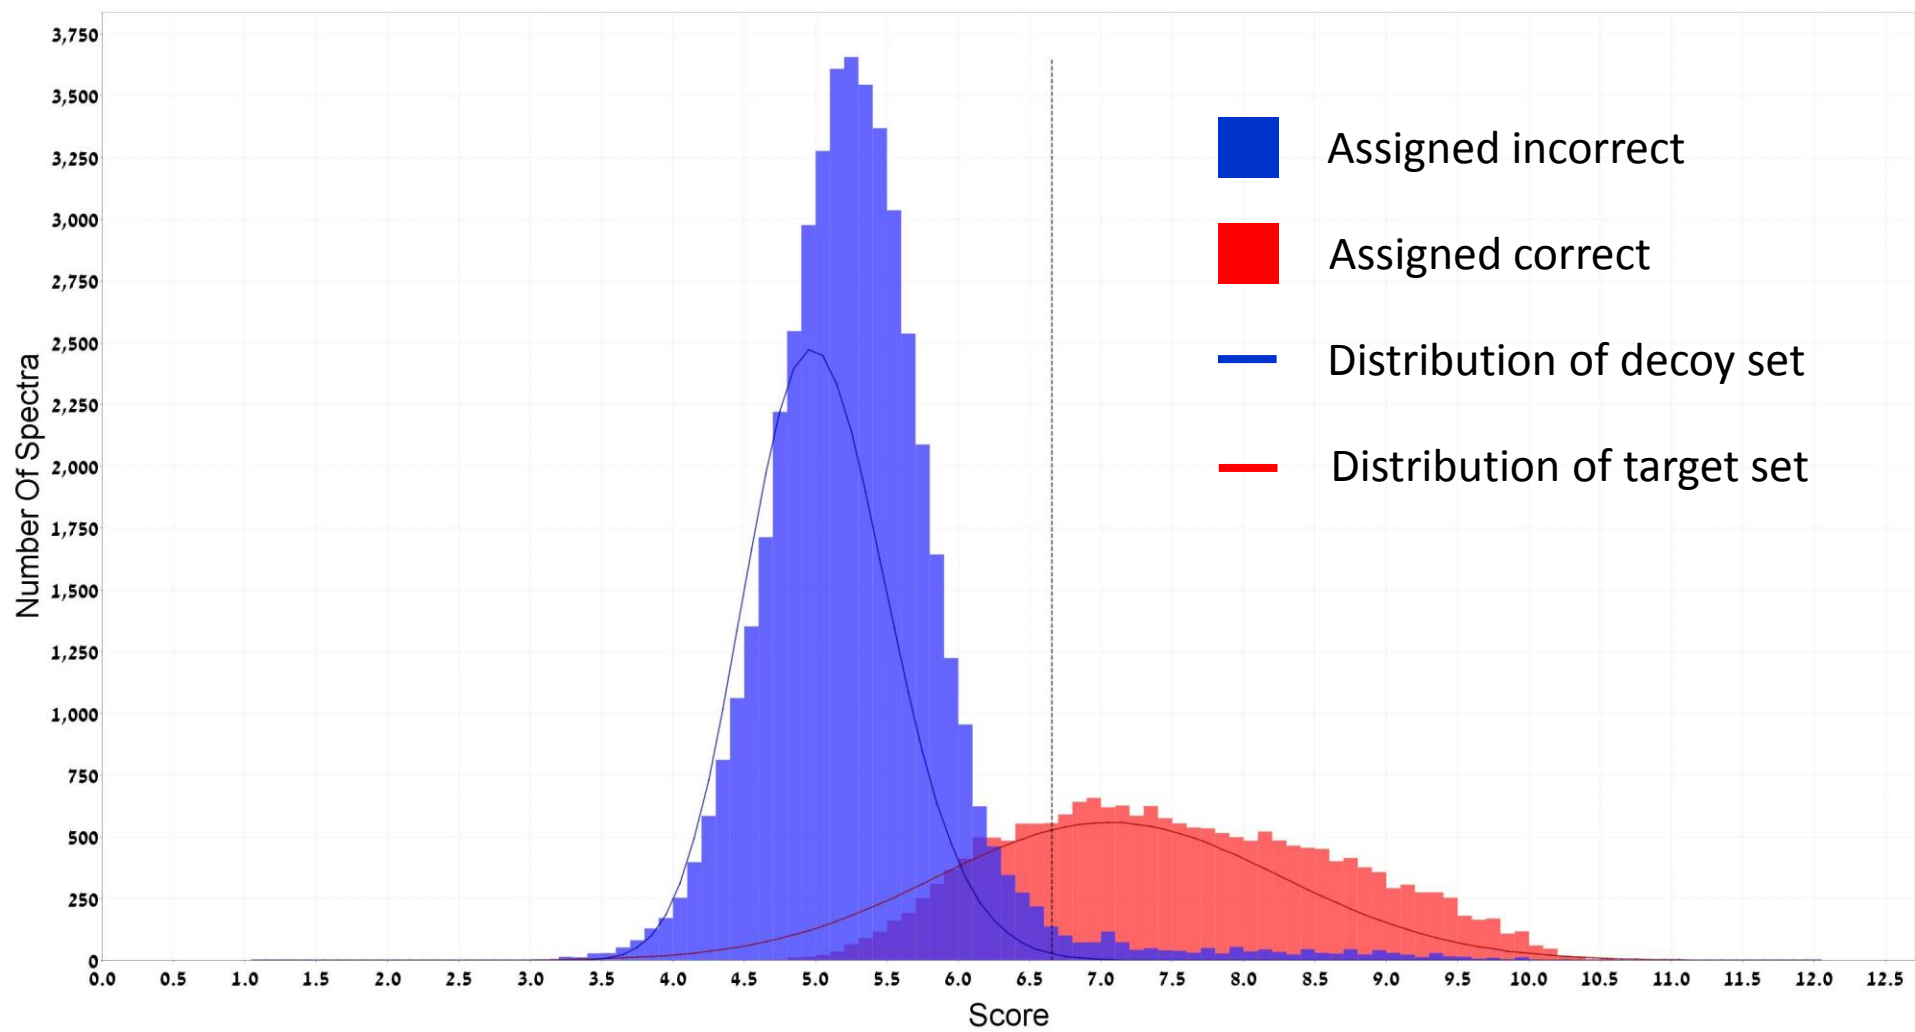

Supplement: Figure_S1-FNL.pdf [file Figure_S1-FNL.pdf]

# Expression of Genes and Chimeras in Human Tissues

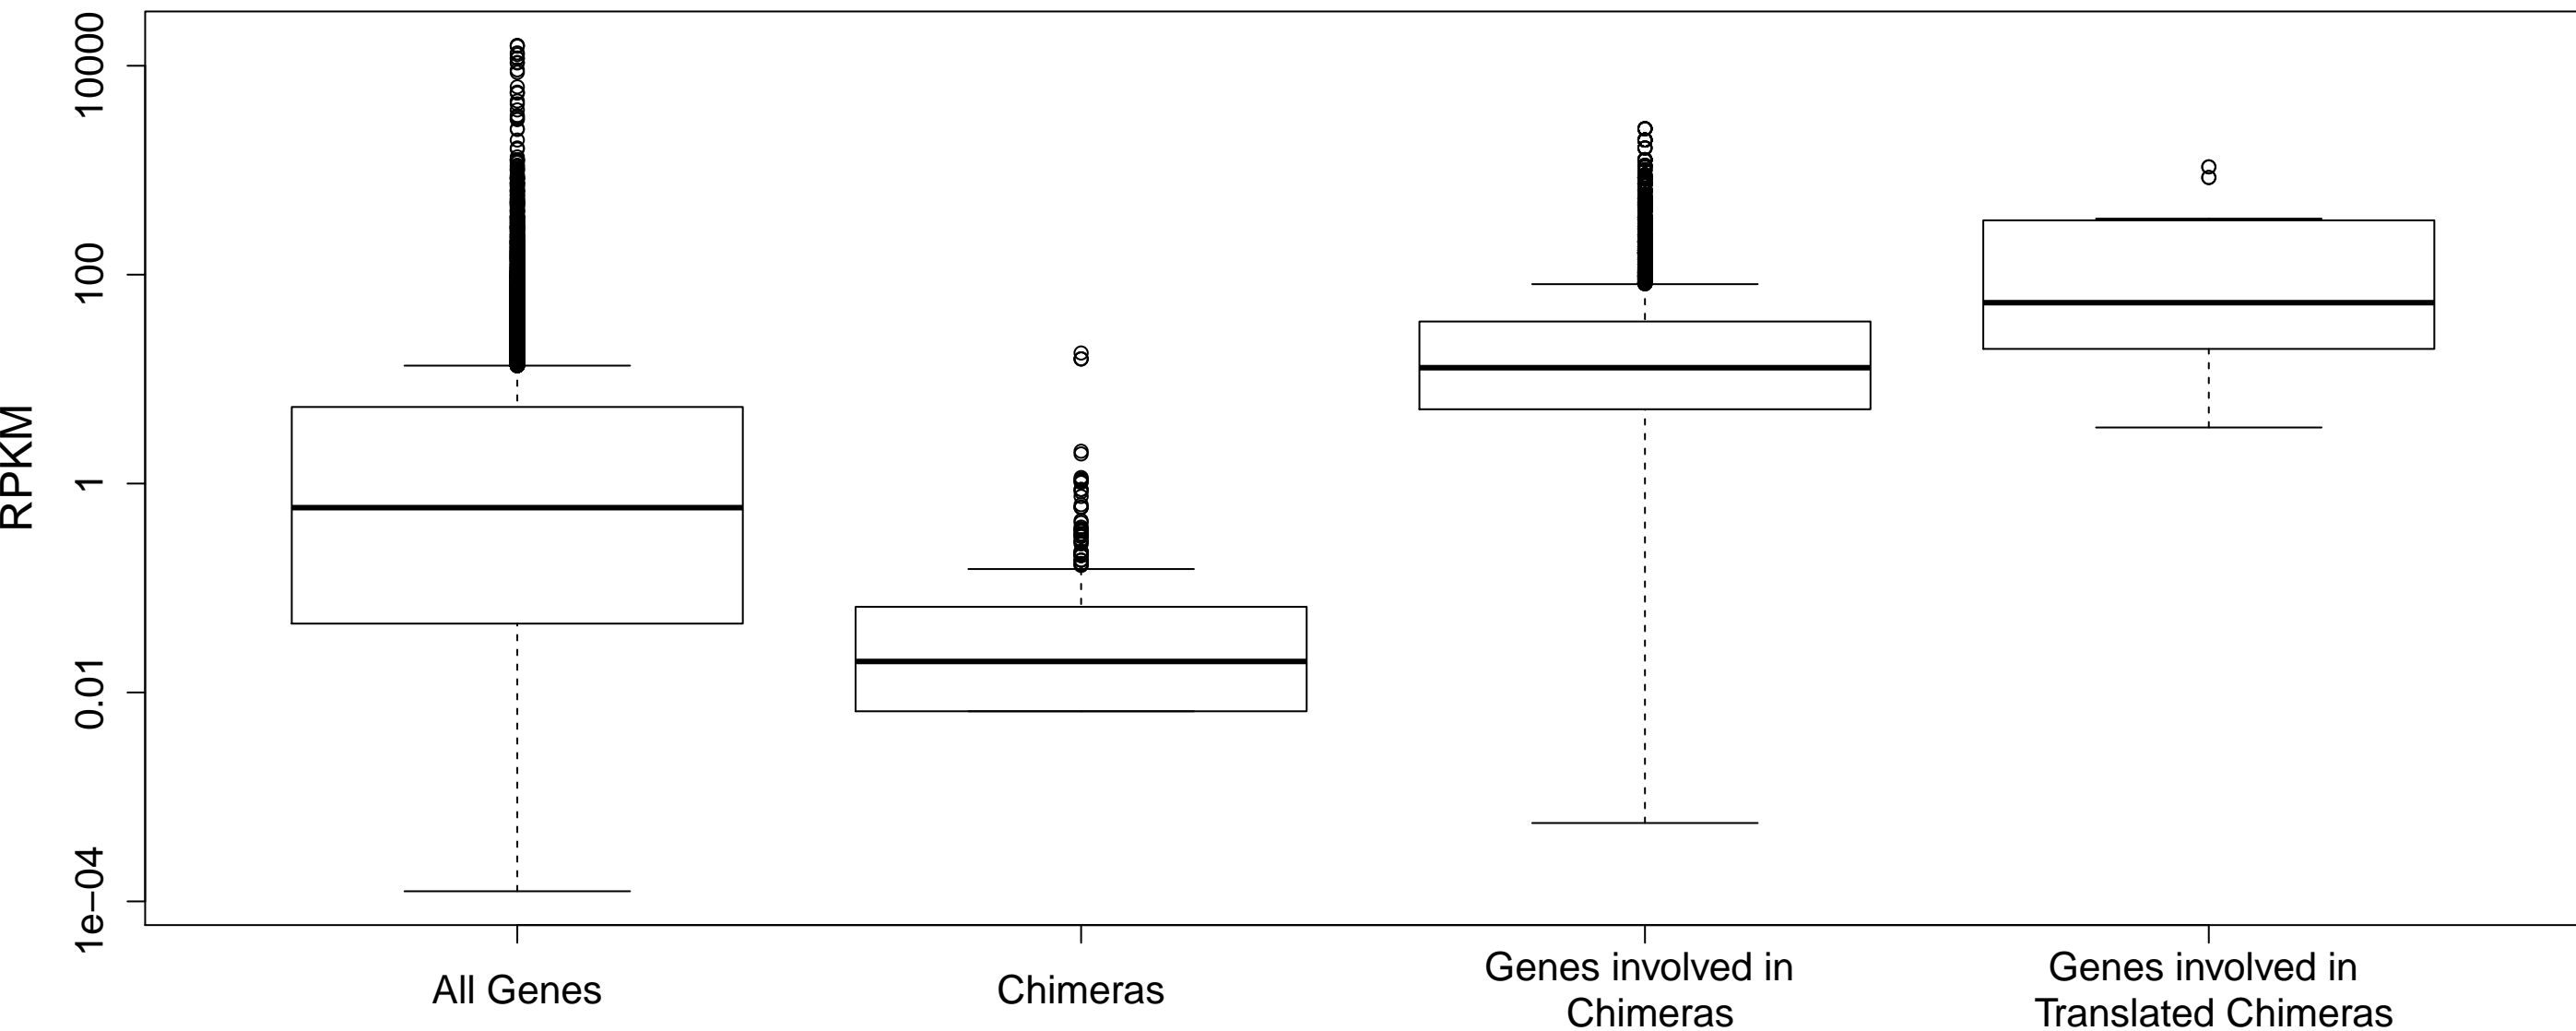

Supplement: Figure_S4-FNL.pdf [file Figure_S4-FNL.pdf]
